# Supplementary material for: Typhoid fever outbreak in the Democratic Republic of Congo: Case control and ecological study
Source: PLoS Negl Trop Dis. 2018 Oct 3;12(10):e0006795. doi: 10.1371/journal.pntd.0006795 (PMC6188896; doi:10.1371/journal.pntd.0006795)
Supplement: S1 Spreadsheet — (XLS) [file pntd.0006795.s006.xls]

## Sheet: EnvAnalysis
Name	Camp	Attack rate (%)	Pop_total_2011	Total cases	Pop dens	Water netw	Waternew2	Camp distance (AVG)	Camp distance (min)	Camp distance (max)	Market distance (AVG)	Market distance (min)	Market distance (max)	River distance (AVG)	River distance (min)	River distance (max)	School distance (AVG)	School distance (min)	School distance (max)	Springs all distance (AVG)	Springs all distance (min)	Springs all distance (max)	Springs ttc0 distance (AVG)	Springs ttc0 distance (min)	Springs ttc0 distance (max)	Springs ttc1 distance (AVG)	Springs ttc1 distance (max)	Springs ttc2 distance (AVG)	Springs ttc2 distance (min)	Springs ttc2 distance (max)	Springs ttc3 distance (AVG)	Springs ttc3 distance (min)	Springs ttc3 distance (max)	Springs ttc4 distance (AVG)	Springs ttc4 distance (min)	Springs ttc4 distance (max)	Springs ttm0 distance (AVG)	Springs ttm0 distance (min)		Springs ttm1 distance (AVG)	Springs ttm1 distance (min)		Springs ttm2 distance (AVG)	Springs ttm2 distance (min)		Springs ttm3 distance (AVG)	Springs ttm3 distance (min)		Springs ttm4 distance (AVG)
CAMP Nsinga	1	5.87372	681	40	144.536	N1grav	9	0	0	0	941.523	788.404	1078.56	211.372	80.8043	321.753	152.677	39.4039	270.717	304.33	231.793	390.654	1262.95	1197.19	1367.92	328.173	448.225	315.159	231.793	399.881	536.877	427.568	656.741	777.73	703.662	865.746	1262.95	1197.19	1367.92	328.173	232.249	448.225	315.159	231.793	399.881	536.877	427.568	656.741	777.73
AS Maternite Plateau	0	2.18882	8315	182	43.8148	N1grav	1	787.527	138.804	1521.85	530.856	0	1228.34	520.606	72.355	913.633	250.973	7.54187	650.16	620.747	278.111	941.266	1675.08	985.901	2314.38	1227.34	1735.63	911.777	505.925	1536.97	913.258	403.542	1381.48	1425.56	864.086	2017.76	1675.08	985.901	2314.38	1227.34	594.061	1735.63	911.777	505.925	1536.97	913.258	403.542	1381.48	1425.56
AS Nzinda 2	0	1.2344	7372	91	85.6592	N1grav	1	1146.5	784.188	1740.94	261.243	0	1162.1	345.332	5.16178	668.739	272.153	8.08487	1035.23	783.204	113.905	1097.37	1633.54	1155.99	2611.52	1364.17	2083.13	1191.11	317.884	1527.04	784.88	115.72	1099.73	1515.5	1027.42	2475.22	1633.54	1155.99	2611.52	1364.17	916.757	2083.13	1191.11	317.884	1527.04	784.88	115.72	1099.73	1515.5
AS Saint Francois	0	0.741997	9434	70	52.4697	N1grav	1	967.529	467.45	1662.8	856.794	13.327	1590.69	218.034	0.550041	660.632	321.516	12.6574	1054.85	527.752	18.831	1027.79	2099.93	1147.6	2725.46	1377.93	2023.17	563.168	26.0091	1125.39	619.47	96.2212	1124.24	1822.82	997.411	2471.82	2099.93	1147.6	2725.46	1377.93	637.209	2023.17	563.168	26.0091	1125.39	619.47	96.2212	1124.24	1822.82
AS Bongisa	0	0.683761	14625	100	176.083	N1grav	1	574.372	40.0272	1019.74	544.045	18.8545	1125.33	183.074	0.242959	546.776	336.393	43.0753	696.162	450.645	46.3654	975.226	825.701	259.262	1289.46	508.463	975.84	589.225	46.3654	1106.28	519.781	48.3642	975.226	640.542	89.942	1013.47	825.701	259.262	1289.46	508.463	49.2633	975.84	589.225	46.3654	1106.28	519.781	48.3642	975.226	640.542
AS Lukolela	0	0.565687	13435	76	161.699	N1grav	1	498.156	0	1503.92	731.907	72.9298	1124.36	125.952	0.85066	330.838	299.963	9.18266	644.819	274.774	18.8487	703.507	942.482	525.183	1367.92	580.803	1486.58	505.87	32.6444	1533.01	369.651	62.627	806.852	660.507	58.6573	1370.92	942.482	525.183	1367.92	580.803	18.8487	1486.58	505.87	32.6444	1533.01	369.651	62.627	806.852	660.507
AS Plateau 1	0	0.383562	7300	28	87.7956	N1grav	1	450.193	0	1011.7	1195.94	634.384	1715.43	295.545	9.73872	663.908	193.594	9.17451	502.073	386.816	10.6451	782.614	2628.22	2070.04	3218.03	1926.88	2497.35	480.036	50.3441	886.201	869.197	305.37	1329.87	2281.9	1699.96	2862.79	2628.22	2070.04	3218.03	1926.88	1295.26	2497.35	480.036	50.3441	886.201	869.197	305.37	1329.87	2281.9
AS Nzinda 3	0	0.369926	10002	37	155.564	N1grav	1	1973.29	1611	2265.12	915.535	450.147	1212.88	297.968	6.96751	533.226	407.846	96.3262	640.528	781.663	200.501	1215.87	2036.49	1582.89	2397.35	2271.37	2765.46	1340.75	695.767	1793.54	872.777	202.974	1555.24	2067.3	1553.87	2659.17	2036.49	1582.89	2397.35	2271.37	1820.38	2765.46	1340.75	695.767	1793.54	872.777	202.974	1555.24	2067.3
AS Nzinda 1	0	0.362319	12144	44	235.483	N1grav	1	1533.13	1228.12	1984.01	536.951	251.952	1006.62	276.495	8.05875	484.934	290.547	3.38399	633.999	644.669	44.8536	996.417	1682.89	1284.31	2343.75	1688.81	2221.14	1543.43	1143.25	1810.71	644.864	47.3458	996.417	1610.83	1205	2263.44	1682.89	1284.31	2343.75	1688.81	1330.64	2221.14	1543.43	1143.25	1810.71	644.864	47.3458	996.417	1610.83
AS Infra	0	0.3477	12367	43	121.217	N1grav	1	2237.72	1927.07	2629.22	1114.96	663.552	1679.22	245.235	2.45728	528.384	424.144	10.2656	801.88	1251.3	767.269	1592.29	1426.61	767.269	2061.5	2250.35	2646.39	1623.81	1089.69	2082.55	1689.69	1034.84	2314.96	1777.34	1203.17	2276.56	1426.61	767.269	2061.5	2250.35	1784.4	2646.39	1623.81	1089.69	2082.55	1689.69	1034.84	2314.96	1777.34
AS Inongo	0	0.315956	11394	36	355.157	N1grav	1	1680.6	1443.8	1965.56	751.292	487.659	1029.19	173.324	0.972663	364.701	597.578	343.271	809.688	1119.52	948.623	1334.33	1348.89	1033.75	1638.97	1677.67	1987.22	1566.64	1254.39	1778.46	1154.65	948.818	1470.22	1355.68	1035.29	1671.39	1348.89	1033.75	1638.97	1677.67	1400.89	1987.22	1566.64	1254.39	1778.46	1154.65	948.818	1470.22	1355.68
AS Etac	0	0.178063	11232	20	151.717	N1grav	1	1671.73	1277.17	2066.3	1163.71	903.126	1486.62	206.182	2.8726	345.977	247.772	4.40203	598.575	548.13	201.719	1172.78	548.13	201.719	1172.78	1412.97	1800.14	1024.88	520.471	1505.68	1426.11	974.411	1816.88	835.283	336.327	1287.52	548.13	201.719	1172.78	1412.97	949.178	1800.14	1024.88	520.471	1505.68	1426.11	974.411	1816.88	835.283
AS Wenze	0	0.157379	17156	27	408.824	N1grav	1	1165.87	876.547	1488.51	399.979	15.7505	749.657	217.548	15.3201	523.961	200.614	3.48934	483.38	880.796	425.788	1152.44	960.812	476.096	1355.63	1141.24	1518.17	1100.61	640.365	1510.42	1065.44	807.013	1354.63	896.551	425.788	1301.34	960.812	476.096	1355.63	1141.24	817.247	1518.17	1100.61	640.365	1510.42	1065.44	807.013	1354.63	896.551
AS Sainte Marie	0	0.7943	8561	68	33.3405	N1pump	2	1276.62	505.694	2333.52	561.756	0	1353.5	301.829	2.99242	571.593	239.47	7.13107	575.802	619.062	62.7116	967.833	2064.72	1150.65	2852.85	2141.54	3004.53	646.381	62.7116	1254.83	1638.17	615.206	2281.7	3040.5	2226.38	3786.69	2064.72	1150.65	2852.85	2141.54	1155.01	3004.53	646.381	62.7116	1254.83	1638.17	615.206	2281.7	3040.5
AS Kazamba	0	0.266598	11628	31	136.874	N1pump	2	711.675	338.422	1219.76	393.261	0	1000.25	365.176	0.316467	707.089	416.303	23.1127	716.001	600.309	132.741	935.037	685.575	226.027	1052.96	622.095	949.858	675.89	219.011	1101.05	1720.56	1308.25	2390.15	4544.84	3902.41	5213.08	685.575	226.027	1052.96	622.095	132.741	949.858	675.89	219.011	1101.05	1720.56	1308.25	2390.15	4544.84
AS Kimpwanza	0	0.235939	13139	31	184.94	N1pump	2	2099.63	1538.64	2694.61	826.374	228.796	1481.93	186.396	10.0975	476.948	417.102	156.931	662.674	1180.16	697.249	1523.86	1388.31	697.249	2051.42	2456.6	2659.36	1606.35	945.474	2170.82	1973.06	1399.96	2435.1	2182.46	1888.33	2629.51	1388.31	697.249	2051.42	2456.6	2114.28	2659.36	1606.35	945.474	2170.82	1973.06	1399.96	2435.1	2182.46
AS Misengi	0	0.20097	14430	29	182.891	N1pump	2	1014.54	488.361	1600.95	480.546	5.71357	853.719	117.484	0.909548	339.621	235.572	19.397	467.446	964.439	550.307	1320.68	1093.43	642.632	1472.72	1141.15	1510.86	965.12	551.109	1321.34	2271.22	1698.24	2874.87	3548.64	3094.03	4018.51	1093.43	642.632	1472.72	1141.15	710.365	1510.86	965.12	551.109	1321.34	2271.22	1698.24	2874.87	3548.64
AS Inga II	0	0.138364	10841	15	93.5077	N1pump	2	603.682	167.96	1094.54	503.182	0	937.878	345.085	25.9623	731.792	682.827	264.514	1055.44	758.102	316.918	1094.93	996.421	548.513	1332.98	786.554	1132.73	1456.75	982.929	1921.03	1052.18	319.496	1571.19	5255.44	4768.3	5745.85	996.421	548.513	1332.98	786.554	316.918	1132.73	1456.75	982.929	1921.03	1052.18	319.496	1571.19	5255.44
AS Kaggwa	0	0.128159	14045	18	188.824	N1pump	2	1440.24	951.195	1822.24	375.708	0	845.489	223.478	0.392454	493.059	153.707	5.50502	344.971	1188.37	812.691	1509.32	1629.24	1346.84	1984.7	1805.95	2321.68	1198.45	812.691	1643.77	2320.91	1861.05	2810.1	2870.03	2367.33	3273.76	1629.24	1346.84	1984.7	1805.95	1474.68	2321.68	1198.45	812.691	1643.77	2320.91	1861.05	2810.1	2870.03
AS 30 Juin	0	0.0469098	8527	4	128.925	N1pump	2	1181.59	820.856	1683.05	750.089	407.327	1257.34	468.901	54.9684	801.64	242.527	8.11719	602.291	596.217	126.592	1076.25	694.164	227.615	1188.52	600.034	1076.25	764.155	259.674	1264.89	1983.21	1493.16	2640.02	5075.88	4497.73	5586.16	694.164	227.615	1188.52	600.034	126.592	1076.25	764.155	259.674	1264.89	1983.21	1493.16	2640.02	5075.88
AS Inga I	0	0.0108601	9208	1	98.6924	N1pump	2	1671.62	965.893	2688.98	1349.29	625.166	2323.26	796.57	202.63	1516.32	294.666	14.9001	560.078	1180.75	653.516	1895.98	1197.41	729.549	1887.46	1255.03	2136.1	1674.99	1169.05	2363.52	2120.11	1424.64	3111.82	6002.15	5366.27	6773.67	1197.41	729.549	1887.46	1255.03	653.516	2136.1	1674.99	1169.05	2363.52	2120.11	1424.64	3111.82	6002.15
AS Masamba	0	0.345752	14172	49	49.7995	N2pump	3	2004.32	757.724	2901.68	1478.04	795.181	2361.05	497.513	98.9772	1072.4	343.331	11.9667	834.454	1983.69	753.142	2896.13	5010.89	3873.2	5951.65	4169.73	5116.04	2311.5	1197.99	3277.37	2185.96	1185.15	3161.48	4624.83	3476.88	5556.42	5010.89	3873.2	5951.65	4169.73	3043.09	5116.04	2311.5	1197.99	3277.37	2185.96	1185.15	3161.48	4624.83
AS Lunia	0	0.120685	12429	15	67.3856	N2pump	3	1048.63	130.087	1832.99	1630.72	935.194	2144.87	233.993	0.0397938	829.348	374.826	20.3254	793.905	662.4	92.4372	1381.75	3396.48	2698.94	4147.19	2580.45	3369.92	753.818	122.132	1382.81	805.355	92.5222	1558.44	3052.4	2379.26	3862.4	3396.48	2698.94	4147.19	2580.45	1900.4	3369.92	753.818	122.132	1382.81	805.355	92.5222	1558.44	3052.4
AS Omeco	0	0.116104	8613	10	108.796	N2pump	3	2592.23	2045.77	3161.85	1407.93	967.315	1833.27	278.466	0.125709	660.82	312.606	21.5939	675.31	934.152	299.32	1484.31	3648.62	3076.76	4037.42	3187.29	3676.32	942.71	299.32	1493.36	1017.02	404.361	1491.43	3528.17	2945.67	3933.25	3648.62	3076.76	4037.42	3187.29	2558.73	3676.32	942.71	299.32	1493.36	1017.02	404.361	1491.43	3528.17
AS Kilokoko	0	0.106858	10294	11	28.7332	N2pump	3	2301.58	243.479	3205.41	1919.47	810.968	2467.34	557.371	19.3903	1166.97	778.468	9.03749	1285.78	1216.1	357.546	1814.31	3379.31	1854.27	4135.11	3147.95	3944.58	1342.76	740.341	1883.92	1331.53	357.546	2216.11	3743.06	2593.73	4532.16	3379.31	1854.27	4135.11	3147.95	1648.74	3944.58	1342.76	740.341	1883.92	1331.53	357.546	2216.11	3743.06
AS Sabuka	0	0.0887902	9010	8	88.2702	N2pump	3	2909.29	2153.79	3720.71	899.2	329.785	1581.08	222.949	1.46079	517.834	321.02	15.0112	602.198	1586.83	1147.47	2312.92	4377.47	3997.16	4937.14	3874.77	4560.27	1586.83	1147.47	2312.92	1736.15	1328.41	2368.16	4253.99	3871.82	4831.97	4377.47	3997.16	4937.14	3874.77	3424.75	4560.27	1586.83	1147.47	2312.92	1736.15	1328.41	2368.16	4253.99
AS CBCO	0	0.0503208	7949	4	144.964	N2pump	3	2041.75	1682.17	2540.64	1043.37	625.044	1583.38	369.169	29.2237	921.118	281.786	24.0547	553.598	908.139	311.161	1531.12	3799.78	3220.1	4381.92	3156.68	3634.36	908.238	311.161	1531.5	1195.47	605.815	1841.03	3637.94	3078.96	4132	3799.78	3220.1	4381.92	3156.68	2617.95	3634.36	908.238	311.161	1531.5	1195.47	605.815	1841.03	3637.94
AS Anciens Combattants	0	0.0112803	8865	1	13.5932	N2pump	3	922.102	0	2979.9	1468.15	265.948	3394.63	473.121	119.011	1924.55	576.573	16.8832	2383.16	1016.75	227.793	2267.61	2158.79	1161.25	3296.36	1915.18	3046.73	1431.62	883.929	3788.09	1031.67	227.793	2268.26	4814.07	4170.44	7198.07	2158.79	1161.25	3296.36	1915.18	874.771	3046.73	1431.62	883.929	3788.09	1031.67	227.793	2268.26	4814.07
CAMP Ebeya	1	6.98174	931	65	53.7752	No	9	0	0	0	439.635	265.948	615.868	378.038	209.374	551.388	177.002	38.4129	353.392	978.353	823.825	1143	1477.62	1307.62	1631.41	1390.39	1529.1	1138.95	908.671	1350.37	999.826	823.825	1249.1	4477.94	4197.93	4672.83	1477.62	1307.62	1631.41	1390.39	1245.56	1529.1	1138.95	908.671	1350.37	999.826	823.825	1249.1	4477.94
CAMP Ngubu	1	4.81771	768	37	286.583	No	9	0	0	0	1549.63	1415.99	1669.79	163.481	92.2767	231.537	231.321	157.534	324.929	144.91	10.6451	292.011	3097.95	2995.28	3191.04	2406.93	2468.55	629.81	569.542	702.933	1018.85	926.754	1121.15	2763.41	2678.39	2841.39	3097.95	2995.28	3191.04	2406.93	2341.27	2468.55	629.81	569.542	702.933	1018.85	926.754	1121.15	2763.41
AS Boji	0	0.251441	9545	24	26.8323	No	0	1757.01	1063.54	2443.78	1569.56	873.94	2212.87	484.646	27.5448	1296.13	255.889	5.3324	576	661.468	265.975	1382.99	661.137	262.978	1373.25	906.766	1713.8	2131.09	1585.88	2602.73	1920.87	1279.12	2725.85	6348.31	5678.07	6943.85	661.137	262.978	1373.25	906.766	269.047	1713.8	2131.09	1585.88	2602.73	1920.87	1279.12	2725.85	6348.31
AS Kibangu	0	0.226171	9285	21	13.2011	No	0	3058.98	2292.95	4191.38	1815.22	775.324	3045.7	657.926	91.6515	1202.38	270.486	14.518	951.922	1338.08	245.908	2197.68	1783.28	975.857	2848.18	2317.17	3502.43	2296.34	1414.23	3443.27	1471.33	261.178	2624.13	2343.99	1563.17	3505.85	1783.28	975.857	2848.18	2317.17	1583.04	3502.43	2296.34	1414.23	3443.27	1471.33	261.178	2624.13	2343.99
AS Ott	0	0.135335	8128	11	65.8506	No	0	1755.77	1246.82	2431.02	611.737	0	1465.72	186.506	4.58168	551.1	466.345	28.7698	885.474	493.66	73.9282	1092.87	523.326	73.9282	1092.87	1134.24	1806.67	1244.72	571.378	1998.38	972.018	508.476	1699.06	1107.25	642.25	1745.87	523.326	73.9282	1092.87	1134.24	621.335	1806.67	1244.72	571.378	1998.38	972.018	508.476	1699.06	1107.25
AS Kazombi Etat	0	0.134367	9675	13	88.4313	No	0	1660.36	1062.46	2244.78	1414.33	828.937	1893.02	329.149	21.5119	584.472	224.384	4.84988	417.873	507.108	68.6394	1040.83	528.433	68.6394	1040.83	1095.97	1929.94	710.867	72.0782	1444.36	1271.06	657.917	1956.03	781.435	105.033	1306.85	528.433	68.6394	1040.83	1095.97	508.936	1929.94	710.867	72.0782	1444.36	1271.06	657.917	1956.03	781.435
AS Ngonga	0	0.112133	8918	10	37.5989	No	0	2052.51	1598.55	2732	1644.83	1154.72	2267.49	519.14	193.508	754.453	220.959	4.73839	531.707	896.196	502.816	1759.62	901.139	502.816	1782.78	929.556	1760.26	961.175	515.938	1867.09	2971.99	2477.26	3424.92	5064.47	4337.28	6097.5	901.139	502.816	1782.78	929.556	513.501	1760.26	961.175	515.938	1867.09	2971.99	2477.26	3424.92	5064.47
AS Marche	0	0.103381	9673	10	79.1086	No	0	2643.2	2034.93	3152.62	382.407	0.0953851	1020.32	348.494	10.3204	743.542	468.866	6.79739	1163.19	2010.74	1227.22	2849.18	4909.52	4124.26	5740.74	4222.56	5005.47	2010.76	1227.22	2849.18	2297.51	1543.04	3152.99	4721.26	3943.18	5501.46	4909.52	4124.26	5740.74	4222.56	3435.56	5005.47	2010.76	1227.22	2849.18	2297.51	1543.04	3152.99	4721.26
AS Mukasa	0	0.0928793	9690	9	32.8954	No	0	2143.77	1301	3232.34	1698.89	894.905	2822.26	797.282	188.242	1358.19	305.988	10.7201	864.719	1339.53	472.835	2466.02	1394.43	524.987	2503.71	1344.65	2599.49	1493.53	616.525	2752.2	2808.53	1896.89	3784.58	5866.31	5011.49	7127.74	1394.43	524.987	2503.71	1344.65	473.202	2599.49	1493.53	616.525	2752.2	2808.53	1896.89	3784.58	5866.31
AS Kazombi CFMC	0	0.0743179	9419	7	81.3765	No	0	2381.93	1909.78	2762.4	2041.28	1465.91	2553.4	529.501	62.6105	1035.02	252.976	3.32556	654.878	924.299	468.859	1387.61	924.35	468.859	1387.61	1778.99	2088.8	1416.12	902.512	1780.16	2008.11	1509.06	2383.53	1413.17	957.478	1783.62	924.35	468.859	1387.61	1778.99	1288.1	2088.8	1416.12	902.512	1780.16	2008.11	1509.06	2383.53	1413.17
AS Sacre Coeur	0	0.0467333	10699	5	2.0675	No	0	1510.93	699.769	3739.68	2422.7	17.6617	3698.22	408.547	23.6968	867.115	998.95	244.035	2951.7	565.482	63.7097	1533.93	2678.13	761.196	4461.13	1267.11	1909.5	1894.18	1026.91	4273.2	745.447	63.7097	1534.15	2653.63	1268.62	4651.04	2678.13	761.196	4461.13	1267.11	77.38	1909.5	1894.18	1026.91	4273.2	745.447	63.7097	1534.15	2653.63
AS Muanga Dibaya	0	0.0516796	11610	6	108.173	No	0	1077.68	694.908	1563.63	557.888	0	1247.91	176.993	0.184231	478.096	497.392	3.6486	804.367	326.088	3.09254	675.528	454.547	3.09254	846.133	666.164	1300.57	782.684	149.683	1381.39	505.261	67.7859	1030.75	596.74	118.048	1170.98	454.547	3.09254	846.133	666.164	124.304	1300.57	782.684	149.683	1381.39	505.261	67.7859	1030.75	596.74
AS Luzolo	0	0.0484086	8263	4	12.6729	No	0	3963.77	3340.72	4920.94	613.842	0	1541.78	778.365	181.377	1663.45	832.151	216.16	1908.85	659.226	11.0765	1571.3	2849.78	2176.59	3780.15	3135.2	4209.57	3745.75	3091.42	4707.15	774.079	163.274	1676.66	3470.32	2814.38	4389.62	2849.78	2176.59	3780.15	3135.2	2505.92	4209.57	3745.75	3091.42	4707.15	774.079	163.274	1676.66	3470.32
AS Pont Kwilu	0	0.0424268	9428	4	31.1336	No	0	3048.18	1829.38	4309.92	858.306	0	1625.37	626.046	4.27422	1554.83	371.034	15.6473	853.067	785.039	162.889	1613.94	2077.88	816.176	3422.38	2227.57	2848.37	2926.85	1660.12	4235.89	808.459	171.316	1645.42	2630.06	1348.3	3955.6	2077.88	816.176	3422.38	2227.57	1443.08	2848.37	2926.85	1660.12	4235.89	808.459	171.316	1645.42	2630.06
AS Kimvolo Etat	0	0	13143	0	21.6135	No	0	3253.92	2560	5241.79	2735.88	1932.91	4705.95	871.578	118.739	1346.97	769.283	153.189	2636.74	1286.65	347.71	2089.71	1536.73	350.371	2922.22	1547.05	2226.31	2270.99	1574.02	4235.86	2756.22	2150.93	4338.11	2291.54	1667.46	4247.72	1536.73	350.371	2922.22	1547.05	462.251	2226.31	2270.99	1574.02	4235.86	2756.22	2150.93	4338.11	2291.54
[truncated: 20 more columns]

## Sheet: AdSbywaterNetworkS3
Name	Camp	Attack rate (%)	Pop_total_2011	Total cases	Pop dens	Water netw
CAMP Nsinga	1	5.87372	681	40	144.536	N1grav
AS Maternite Plateau	0	2.18882	8315	182	43.8148	N1grav
AS Nzinda 2	0	1.2344	7372	91	85.6592	N1grav
AS Saint Francois	0	0.741997	9434	70	52.4697	N1grav
AS Bongisa	0	0.683761	14625	100	176.083	N1grav
AS Lukolela	0	0.565687	13435	76	161.699	N1grav
AS Plateau 1	0	0.383562	7300	28	87.7956	N1grav
AS Nzinda 3	0	0.369926	10002	37	155.564	N1grav
AS Nzinda 1	0	0.362319	12144	44	235.483	N1grav
AS Infra	0	0.3477	12367	43	121.217	N1grav
AS Inongo	0	0.315956	11394	36	355.157	N1grav
AS Etac	0	0.178063	11232	20	151.717	N1grav
AS Wenze	0	0.157379	17156	27	408.824	N1grav
AS Sainte Marie	0	0.7943	8561	68	33.3405	N1pump
AS Kazamba	0	0.266598	11628	31	136.874	N1pump
AS Kimpwanza	0	0.235939	13139	31	184.94	N1pump
AS Misengi	0	0.20097	14430	29	182.891	N1pump
AS Inga II	0	0.138364	10841	15	93.5077	N1pump
AS Kaggwa	0	0.128159	14045	18	188.824	N1pump
AS 30 Juin	0	0.0469098	8527	4	128.925	N1pump
AS Inga I	0	0.0108601	9208	1	98.6924	N1pump
AS Masamba	0	0.345752	14172	49	49.7995	N2pump
AS Lunia	0	0.120685	12429	15	67.3856	N2pump
AS Omeco	0	0.116104	8613	10	108.796	N2pump
AS Kilokoko	0	0.106858	10294	11	28.7332	N2pump
AS Sabuka	0	0.0887902	9010	8	88.2702	N2pump
AS CBCO	0	0.0503208	7949	4	144.964	N2pump
AS Anciens Combattants	0	0.0112803	8865	1	13.5932	N2pump
CAMP Ebeya	1	6.98174	931	65	53.7752	No	Off network water sources
CAMP Ngubu	1	4.81771	768	37	286.583	No
AS Boji	0	0.251441	9545	24	26.8323	No
AS Kibangu	0	0.226171	9285	21	13.2011	No
AS Ott	0	0.135335	8128	11	65.8506	No
AS Kazombi Etat	0	0.134367	9675	13	88.4313	No
AS Ngonga	0	0.112133	8918	10	37.5989	No
AS Marche	0	0.103381	9673	10	79.1086	No
AS Mukasa	0	0.0928793	9690	9	32.8954	No
AS Kazombi CFMC	0	0.0743179	9419	7	81.3765	No
AS Sacre Coeur	0	0.0467333	10699	5	2.0675	No
AS Muanga Dibaya	0	0.0516796	11610	6	108.173	No
AS Luzolo	0	0.0484086	8263	4	12.6729	No
AS Pont Kwilu	0	0.0424268	9428	4	31.1336	No
AS Kimvolo Etat	0	0	13143	0	21.6135	No
